# Supplementary material for: Selecting and analysing climate change adaptation measures at six research sites across Europe
Source: Copernicus journal article supplement (doi:10.5194/nhess-21-2145-2021), 2021-07-13
Supplement: Supplementary file 1 [file nhess-21-2145-2021-supplement.pdf]

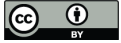

*Supplement of*

## **Selecting and analysing climate change adaptation measures at six research sites across Europe**

**Henk-Jan van Alphen et al.**

*Correspondence to:* Henk-Jan van Alphen ([henk-jan.van.alphen@kwrwater.nl](mailto:henk-jan.van.alphen@kwrwater.nl))

The copyright of individual parts of the supplement might differ from the article licence.

# BINGO WP5 – Template for Governance Analysis per Adaptation Measure (part of T5.3)

## Content Layer

The content layer comprises the first layer of water governance. Below, several indicators are formulated. The first set of indicators aim to characterize the adaptation measure. The second set of indicators assesses the types of knowledge needed to develop and implement the adaptation measure.

### Characterization of the adaptation measure

#### *Short description of the measure*

*Provide a short introduction to the measure: what are its main aims and characteristics?*

#### *Related BINGO objective*

*Mark the BINGO-risk(s) targeted by the measure in the table below with a yellow shading*

|                                           |                                          |                |                                                          |
|-------------------------------------------|------------------------------------------|----------------|----------------------------------------------------------|
| Decrease of water quantity due to drought | Decrease of water quality due to drought | (Flash) Floods | Decrease of water quality due to increased precipitation |
|-------------------------------------------|------------------------------------------|----------------|----------------------------------------------------------|

#### *Related BINGO scope*

*Mark the BINGO risk-scope addressed by the measure in the table below with a yellow shading*

|                       |                                     |                               |                            |                     |     |
|-----------------------|-------------------------------------|-------------------------------|----------------------------|---------------------|-----|
| Continuity of service | Sustainable management of resources | Protection of the environment | People and property safety | Economic management | ... |
|-----------------------|-------------------------------------|-------------------------------|----------------------------|---------------------|-----|

#### *Type of measure*

*Characterize the type of measure in terms of the IPCC's categorization of adaptation measures using a yellow shading in the table below.<sup>1</sup>*

| Structural/physical                     |                                                         |                                                             |                                                              | Social                                      |                                            |                                                                   | Institutional                                                 |                                                                                             |                                                                 |
|-----------------------------------------|---------------------------------------------------------|-------------------------------------------------------------|--------------------------------------------------------------|---------------------------------------------|--------------------------------------------|-------------------------------------------------------------------|---------------------------------------------------------------|---------------------------------------------------------------------------------------------|-----------------------------------------------------------------|
| <b>Engineered and build environment</b> | <b>Technological</b> (e.g. irrigation or fertilization) | <b>Ecosystem based</b> (using ecosystem functions to adapt) | <b>(Basic public) Services</b> (e.g. health, water, housing) | <b>Educational</b> (e.g. awareness raising) | <b>Informational</b> (e.g. hazard-mapping) | <b>Behavioral</b> (e.g. changing water use or cropping practices) | <b>Financial</b> (incentives or direct funding of activities) | <b>Laws and regulations</b> (e.g. protected areas, technological standards, building codes) | <b>Government policies and programs</b> (e.g. adaptation plans) |

#### *Targeted sector*

*Indicate the sector targeted by the measure in the table below with a yellow shading*

|                           |                     |                |              |             |
|---------------------------|---------------------|----------------|--------------|-------------|
| Water Resource Management | Public Water Supply | Urban drainage | Flood safety | Agriculture |
|---------------------------|---------------------|----------------|--------------|-------------|

<sup>1</sup> For more information on the categorization, see the IPCC's Fifth Assessment Report, chapter 14, pages 845-849: [https://www.ipcc.ch/pdf/assessment-report/ar5/wg2/WGIIAR5-Chap14\\_FINAL.pdf](https://www.ipcc.ch/pdf/assessment-report/ar5/wg2/WGIIAR5-Chap14_FINAL.pdf) (October 2016).



## Knowledge requirements

*What knowledge is required to develop and implement the measure? What level and detail of information about the addressed risk is needed to effectively implement the measure? What types of knowledge and skills are needed to develop and/or implement the measure (e.g. about the water system, the agricultural cycle, consumer behavior, process management)?*

*How can this knowledge best be classified? Please highlight in yellow.*

|                     |                          |                                                     |
|---------------------|--------------------------|-----------------------------------------------------|
| Technical knowledge | Administrative knowledge | Knowledge about behavior, interests and preferences |
|---------------------|--------------------------|-----------------------------------------------------|

*To what extent are the knowledge requirements met at the research site?*

## **Institutional Layer**

The institutional layer deals with the aspects that ensure an effective operation of the adaptation measure. Within the Three Layer Framework, this layer is further subdivided into an adequate organizational framework, necessary legal instruments and a good financing structure. Below, indicators are formulated for each of these aspects.

### Organizational requirements

#### *Responsibility structure*

*Which (constellation of) actor(s) should be involved in the development and implementation of the adaptation measure?*

*Are the necessary actors currently involved sufficiently?*

*What requirements are placed on coordination between actors, levels and sectors?*

*Are these requirements met at the research site?*

#### *Administrative resources*

*Which administrative resources are needed to implement the measure? For example, staff, administrative (e.g. accounting or monitoring) capacities, regulatory (e.g. independent standard-setting or adjusting) capacities, technical expertise, knowledge infrastructure, etc.*

*Are these administrative resources available at the research site?*

#### *Implementation level or scale*

*At which level or scale will the measure be implemented?*

#### *Implementation time*

*What is the expected time needed to implement the adaptation measure, from measure development to its implementation in practice?*

#### *Life time*

*What is the expected life time of the adaptation measure?*

## Legal requirements

### *Relevant EU legislation, policy and directives*

*What EU directives and regulations influence the governance of this measure?*

### *Legal-operational requirements*

*Does the measure require setting legal standards (e.g. technological process-requirements, output standards) or the use of certain types of rights (i.e. land-use or taxation rights)?*

*Are these legal-operational requirements met at the research site?*

## Financial requirements

### *Costs*

*What types of costs are involved with the implementation and operation of the adaptation measure?*

### *Financing structure*

*How can these financial means be generated; which sources can be used, which actor(s) should pay?*

*Are the necessary financial resources available at the research site?*

## **Relational Layer**

The relational layer deals with the requirements placed on the wider governance context of the adaptation measure. The Three Layer Framework makes a distinction between culture and ethics, and public accountability, communication and participation in this regard.

## Culture and ethics

*Which cultural or ethical issues either support or obstruct the implementation of the adaptation measure?*

## Public accountability, communication, and participation

*Which public accountability requirements are there for the adaptation measure? Are there specific transparency requirements? What requirements does this place on communication of responsible actors and agencies, and public participation?*

*Are these requirements sufficiently met at the research site?*

## **Summary**

This section summarizes the key governance aspects, in terms of key advantages and governance challenges connected to the adaptation measure.

### *Key advantages of the measure*

*Shortly summarize the most important advantages of the adaptation measure; what are its key strengths, do they for example lie in technical robustness, integrative capacities, or financial security?*

### ***Key governance challenges***

*Shortly summarize the key governance challenges connected to the adaptation measure, e.g. in terms of costs, conflicts of interests, contested technologies, etc.*

## **References**

*Add literature references and references to online resources used in this fact sheet.*
